# Supplementary material for: Deciphering Biomarkers for Leptomeningeal Metastasis in Malignant Hemopathies (Lymphoma/Leukemia) Patients by Comprehensive Multipronged Proteomics Characterization of Cerebrospinal Fluid
Source: MDPI journal article supplement (doi:10.3390/cancers14020449), 2022-01-17
Supplement: s1 [file s1]

**(a).**

A heatmap visualization of gene expression data. The x-axis represents genes, and the y-axis represents samples. A dendrogram at the top shows hierarchical clustering of samples, while a dendrogram on the left shows clustering of genes. A color scale on the right indicates expression levels from 0 (yellow) to 4 (dark red). The genes listed on the x-axis are: TNF-1, PTPRC-3, PTPRC-4, ANPEP, CCL3, CCL2, CCL4, CCL5, CCL6, CCL7, CCL8, CCL9, CCL10, CCL11, CCL12, CCL13, CCL14, CCL15, CCL16, CCL17, CCL18, CCL19, CCL20, CCL21, CCL22, CCL23, CCL24, CCL25, CCL26, CCL27, CCL28, CCL29, CCL30, CCL31, CCL32, CCL33, CCL34, CCL35, CCL36, CCL37, CCL38, CCL39, CCL40, CCL41, CCL42, CCL43, CCL44, CCL45, CCL46, CCL47, CCL48, CCL49, CCL50, CCL51, CCL52, CCL53, CCL54, CCL55, CCL56, CCL57, CCL58, CCL59, CCL60, CCL61, CCL62, CCL63, CCL64, CCL65, CCL66, CCL67, CCL68, CCL69, CCL70, CCL71, CCL72, CCL73, CCL74, CCL75, CCL76, CCL77, CCL78, CCL79, CCL80, CCL81, CCL82, CCL83, CCL84, CCL85, CCL86, CCL87, CCL88, CCL89, CCL90, CCL91, CCL92, CCL93, CCL94, CCL95, CCL96, CCL97, CCL98, CCL99, CCL100, CCL101, CCL102, CCL103, CCL104, CCL105, CCL106, CCL107, CCL108, CCL109, CCL110, CCL111, CCL112, CCL113, CCL114, CCL115, CCL116, CCL117, CCL118, CCL119, CCL120, CCL121, CCL122, CCL123, CCL124, CCL125, CCL126, CCL127, CCL128, CCL129, CCL130, CCL131, CCL132, CCL133, CCL134, CCL135, CCL136, CCL137, CCL138, CCL139, CCL140, CCL141, CCL142, CCL143, CCL144, CCL145, CCL146, CCL147, CCL148, CCL149, CCL150, CCL151, CCL152, CCL153, CCL154, CCL155, CCL156, CCL157, CCL158, CCL159, CCL160, CCL161, CCL162, CCL163, CCL164, CCL165, CCL166, CCL167, CCL168, CCL169, CCL170, CCL171, CCL172, CCL173, CCL174, CCL175, CCL176, CCL177, CCL178, CCL179, CCL180, CCL181, CCL182, CCL183, CCL184, CCL185, CCL186, CCL187, CCL188, CCL189, CCL190, CCL191, CCL192, CCL193, CCL194, CCL195, CCL196, CCL197, CCL198, CCL199, CCL200, CCL201, CCL202, CCL203, CCL204, CCL205, CCL206, CCL207, CCL208, CCL209, CCL210, CCL211, CCL212, CCL213, CCL214, CCL215, CCL216, CCL217, CCL218, CCL219, CCL220, CCL221, CCL222, CCL223, CCL224, CCL225, CCL226, CCL227, CCL228, CCL229, CCL230, CCL231, CCL232, CCL233, CCL234, CCL235, CCL236, CCL237, CCL238, CCL239, CCL240, CCL241, CCL242, CCL243, CCL244, CCL245, CCL246, CCL247, CCL248, CCL249, CCL250, CCL251, CCL252, CCL253, CCL254, CCL255, CCL256, CCL257, CCL258, CCL259, CCL260, CCL261, CCL262, CCL263, CCL264, CCL265, CCL266, CCL267, CCL268, CCL269, CCL270, CCL271, CCL272, CCL273, CCL274, CCL275, CCL276, CCL277, CCL278, CCL279, CCL280, CCL281, CCL282, CCL283, CCL284, CCL285, CCL286, CCL287, CCL288, CCL289, CCL290, CCL291, CCL292, CCL293, CCL294, CCL295, CCL296, CCL297, CCL298, CCL299, CCL300, CCL301, CCL302, CCL303, CCL304, CCL305, CCL306, CCL307, CCL308, CCL309, CCL310, CCL311, CCL312, CCL313, CCL314, CCL315, CCL316, CCL317, CCL318, CCL319, CCL320, CCL321, CCL322, CCL323, CCL324, CCL325, CCL326, CCL327, CCL328, CCL329, CCL330, CCL331, CCL332, CCL333, CCL334, CCL335, CCL336, CCL337, CCL338, CCL339, CCL340, CCL341, CCL342, CCL343, CCL344, CCL345, CCL346, CCL347, CCL348, CCL349, CCL350, CCL351, CCL352, CCL353, CCL354, CCL355, CCL356, CCL357, CCL358, CCL359, CCL360, CCL361, CCL362, CCL363, CCL364, CCL365, CCL366, CCL367, CCL368, CCL369, CCL370, CCL371, CCL372, CCL373, CCL374, CCL375, CCL376, CCL377, CCL378, CCL379, CCL380, CCL381, CCL382, CCL383, CCL384, CCL385, CCL386, CCL387, CCL388, CCL389, CCL390, CCL391, CCL392, CCL393, CCL394, CCL395, CCL396, CCL397, CCL398, CCL399, CCL400, CCL401, CCL402, CCL403, CCL404, CCL405, CCL406, CCL407, CCL408, CCL409, CCL410, CCL411, CCL412, CCL413, CCL414, CCL415, CCL416, CCL417, CCL418, CCL419, CCL420, CCL421, CCL422, CCL423, CCL424, CCL425, CCL426, CCL427, CCL428, CCL429, CCL430, CCL431, CCL432, CCL433, CCL434, CCL435, CCL436, CCL437, CCL438, CCL439, CCL440, CCL441, CCL442, CCL443, CCL444, CCL445, CCL446, CCL447, CCL448, CCL449, CCL450, CCL451, CCL452, CCL453, CCL454, CCL455, CCL456, CCL457, CCL458, CCL459, CCL460, CCL461, CCL462, CCL463, CCL464, CCL465, CCL466, CCL467, CCL468, CCL469, CCL470, CCL471, CCL472, CCL473, CCL474, CCL475, CCL476, CCL477, CCL478, CCL479, CCL480, CCL481, CCL482, CCL483, CCL484, CCL485, CCL486, CCL487, CCL488, CCL489, CCL490, CCL491, CCL492, CCL493, CCL494, CCL495, CCL496, CCL497, CCL498, CCL499, CCL500, CCL501, CCL502, CCL503, CCL504, CCL505, CCL506, CCL507, CCL508, CCL509, CCL510, CCL511, CCL512, CCL513, CCL514, CCL515, CCL516, CCL517, CCL518, CCL519, CCL520, CCL521, CCL522, CCL523, CCL524, CCL525, CCL526, CCL527, CCL528, CCL529, CCL530, CCL531, CCL532, CCL533, CCL534, CCL535, CCL536, CCL537, CCL538, CCL539, CCL540, CCL541, CCL542, CCL543, CCL544, CCL545, CCL546, CCL547, CCL548, CCL549, CCL550, CCL551, CCL552, CCL553, CCL554, CCL555, CCL556, CCL557, CCL558, CCL559, CCL560, CCL561, CCL562, CCL563, CCL564, CCL565, CCL566, CCL567, CCL568, CCL569, CCL570, CCL571, CCL572, CCL573, CCL574, CCL575, CCL576, CCL577, CCL578, CCL579, CCL580, CCL581, CCL582, CCL583, CCL584, CCL585, CCL586, CCL587, CCL588, CCL589, CCL590, CCL591, CCL592, CCL593, CCL594, CCL595, CCL596, CCL597, CCL598, CCL599, CCL600, CCL601, CCL602, CCL603, CCL604, CCL605, CCL606, CCL607, CCL608, CCL609, CCL610, CCL611, CCL612, CCL613, CCL614, CCL615, CCL616, CCL617, CCL618, CCL619, CCL620, CCL621, CCL622, CCL623, CCL624, CCL625, CCL626, CCL627, CCL628, CCL629, CCL630, CCL631, CCL632, CCL633, CCL634, CCL635, CCL636, CCL637, CCL638, CCL639, CCL640, CCL641, CCL642, CCL643, CCL644, CCL645, CCL646, CCL647, CCL648, CCL649, CCL650, CCL651, CCL652, CCL653, CCL654, CCL655, CCL656, CCL657, CCL658, CCL659, CCL660, CCL661, CCL662, CCL663, CCL664, CCL665, CCL666, CCL667, CCL668, CCL669, CCL670, CCL671, CCL672, CCL673, CCL674, CCL675, CCL676, CCL677, CCL678, CCL679, CCL680, CCL681, CCL68
