# Supplementary figures and images for: Deciphering Biomarkers for Leptomeningeal Metastasis in Malignant Hemopathies (Lymphoma/Leukemia) Patients by Comprehensive Multipronged Proteomics Characterization of Cerebrospinal Fluid
Source: MDPI journal article supplement (doi:10.3390/cancers14020449), 2022-01-17

Supplementary Figure S6.

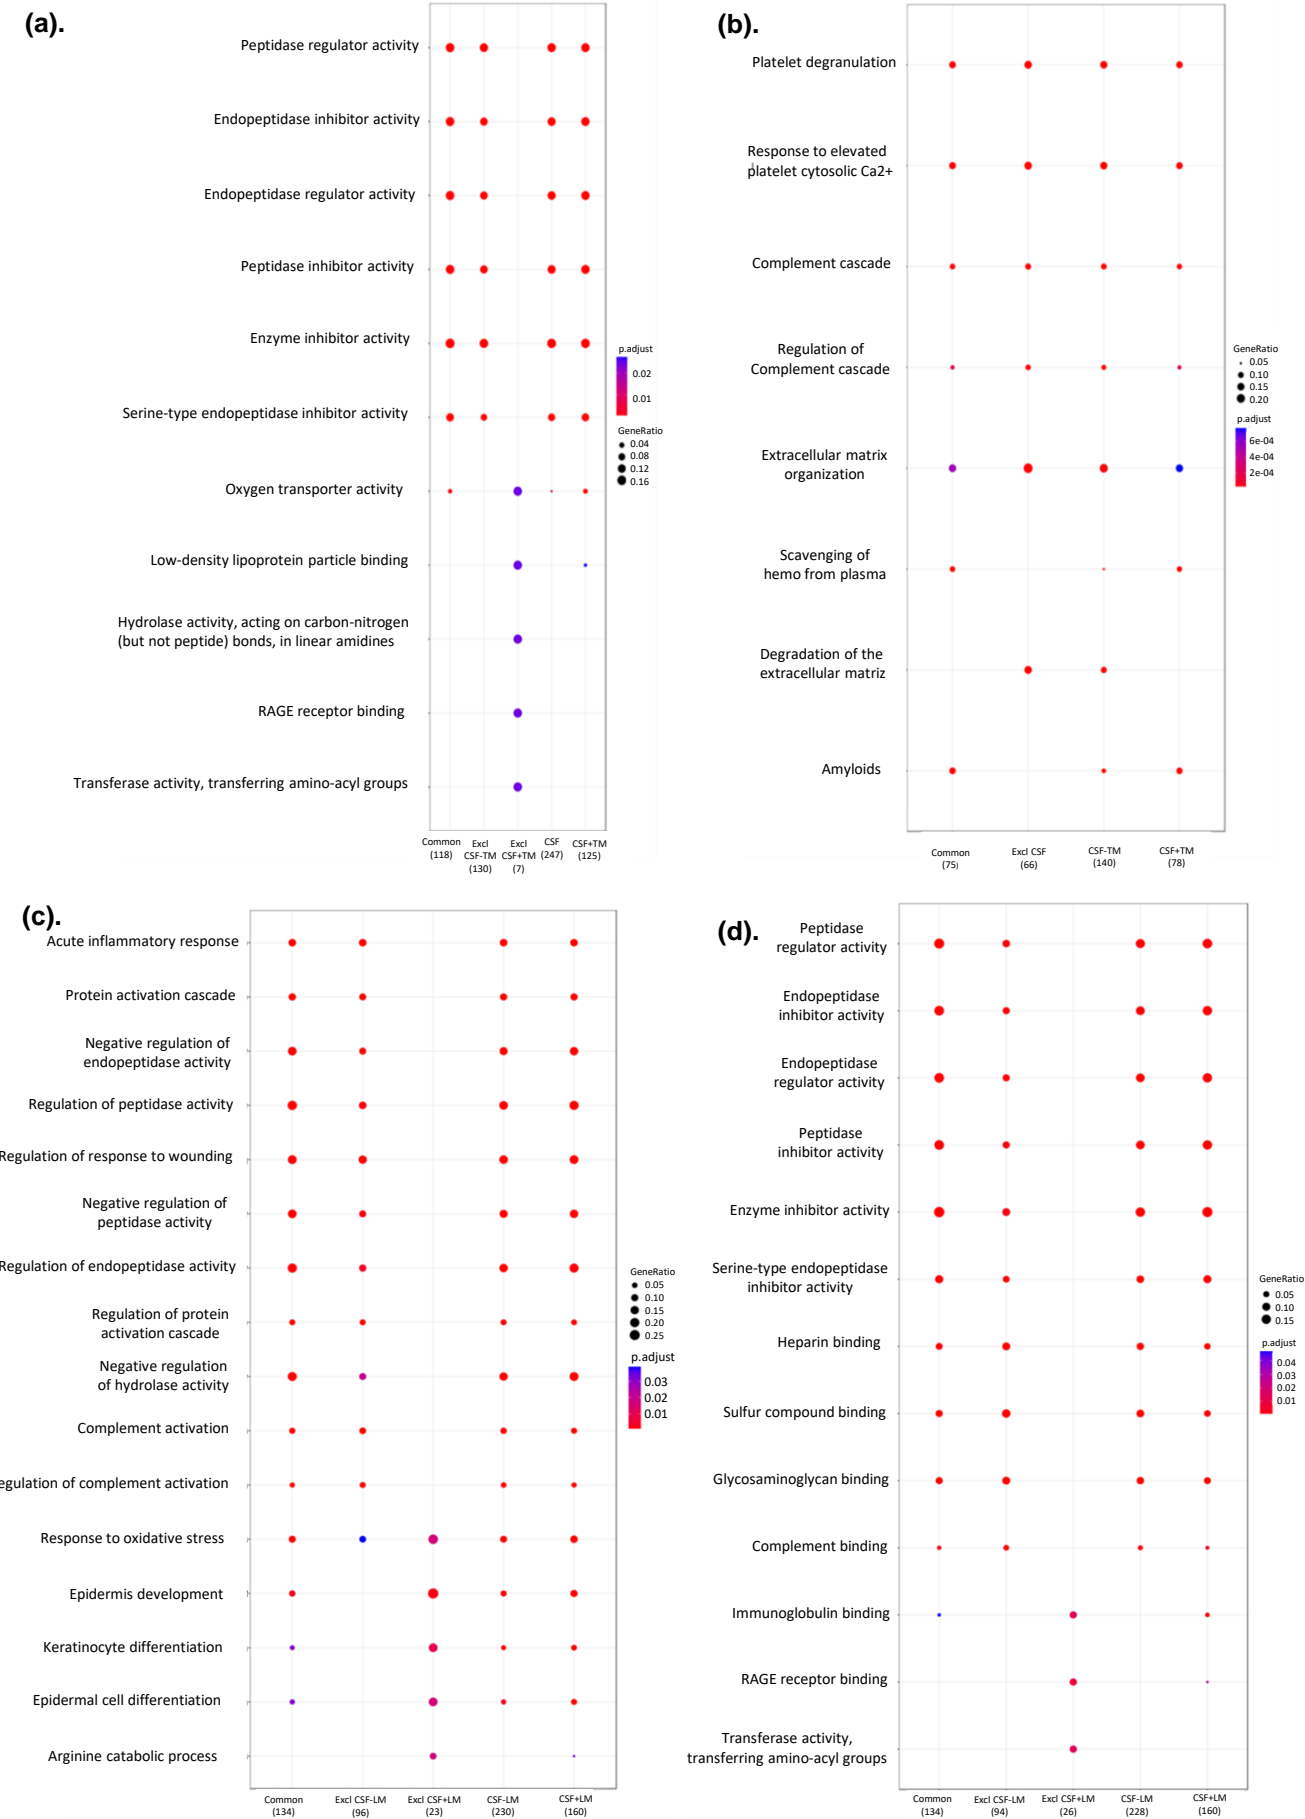

Supplement: s1 [file s1]

**Supplementary Figure S4.**

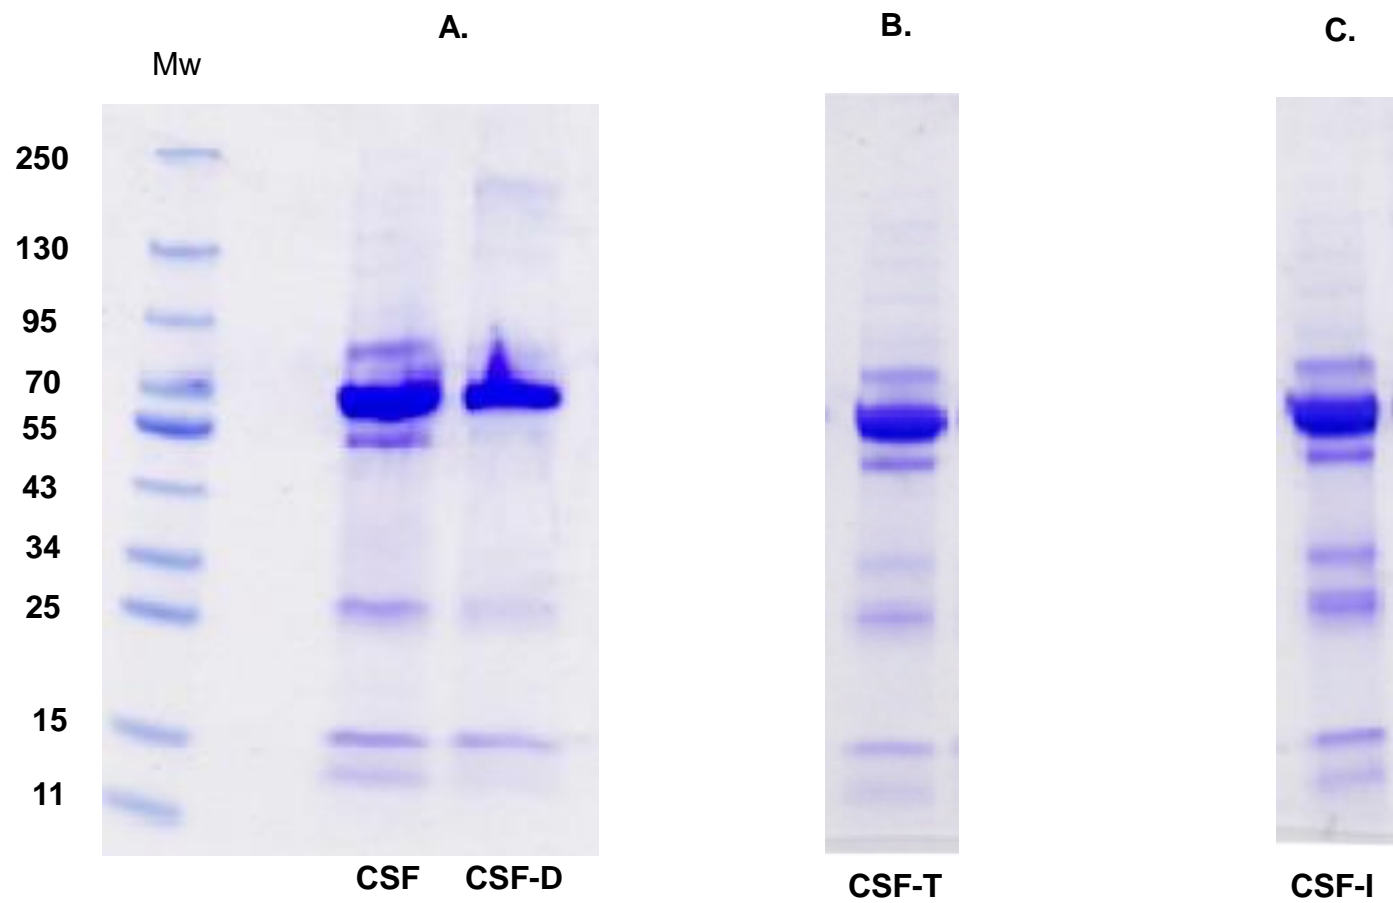

Supplement: s1 [file s1]

(a).

**(b).**

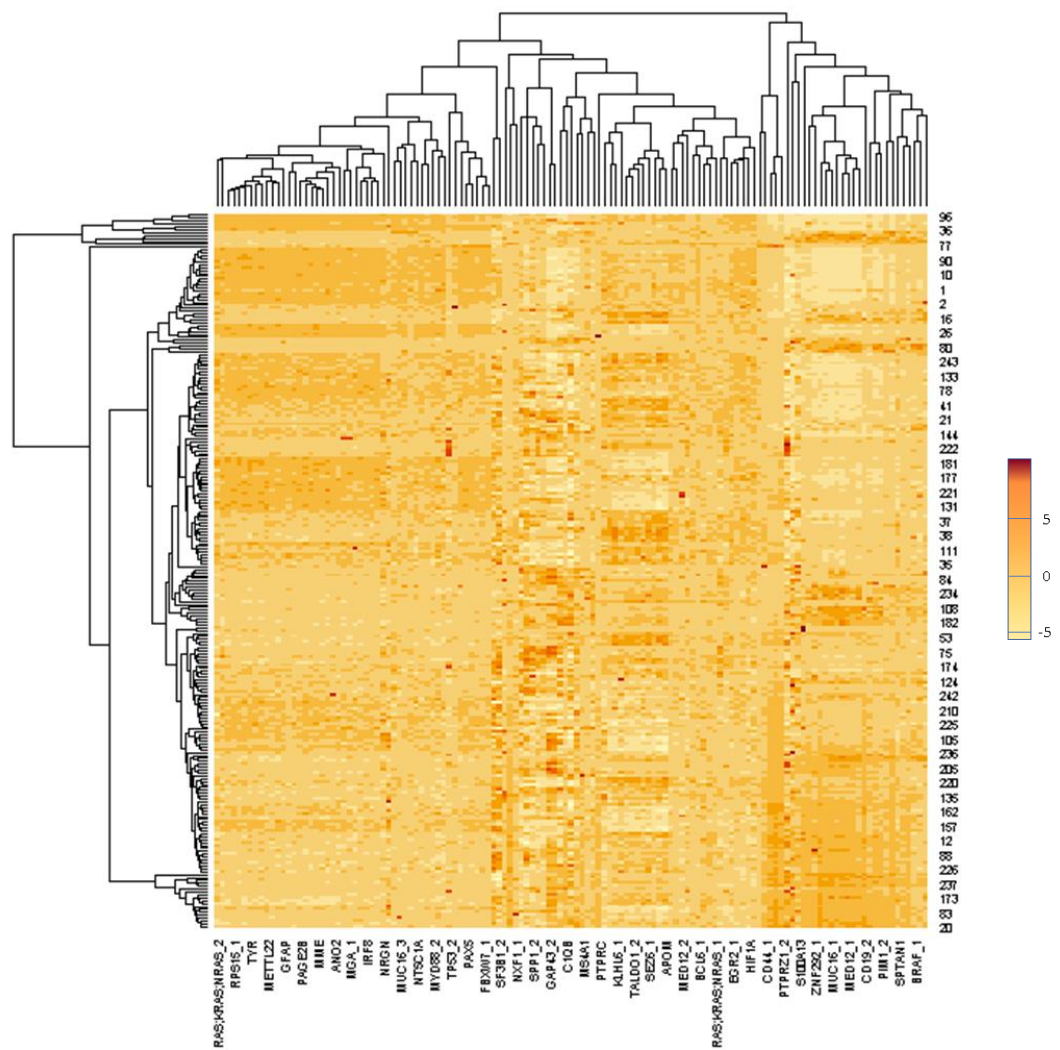

Supplement: s1 [file s1]

Supplementary Figure S2.

(a).

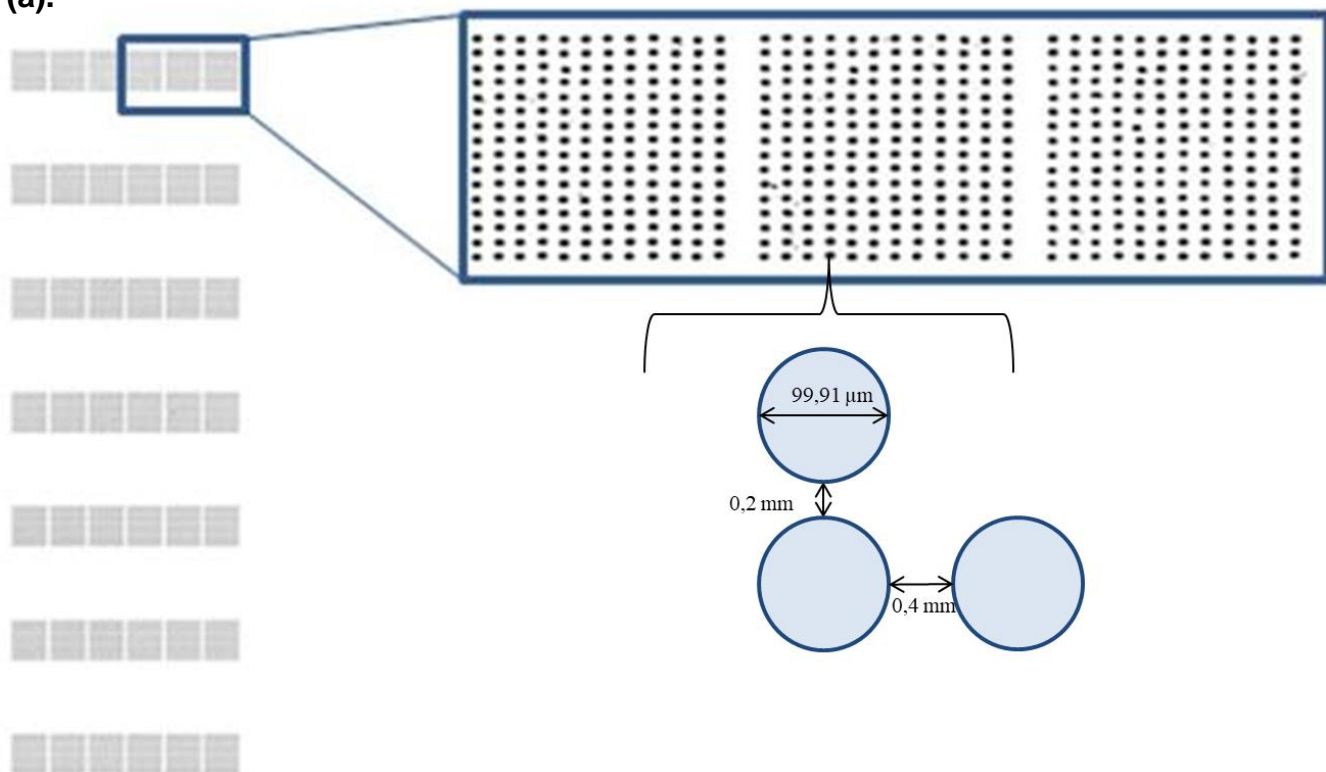

(b).

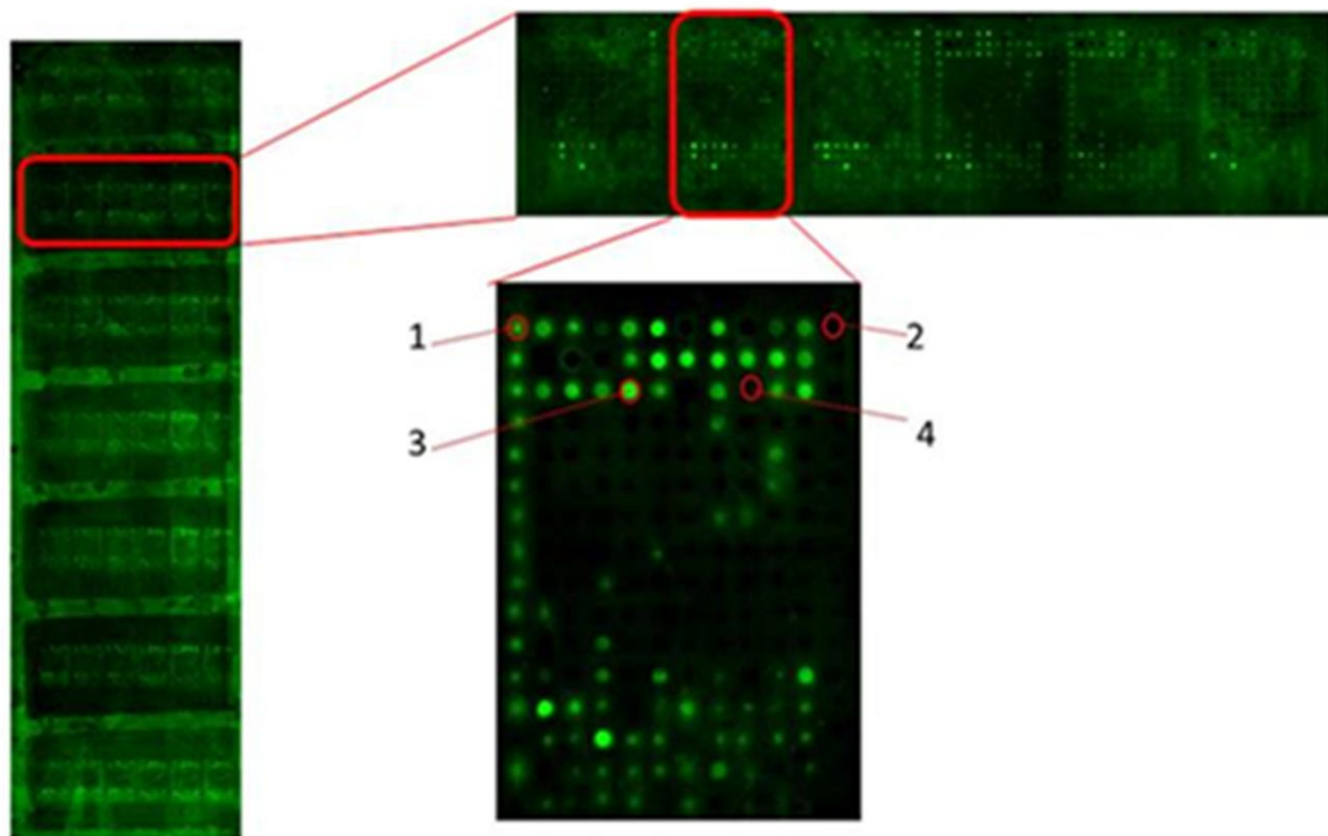

Supplement: s1 [file s1]

## Supplementary Figure S3.

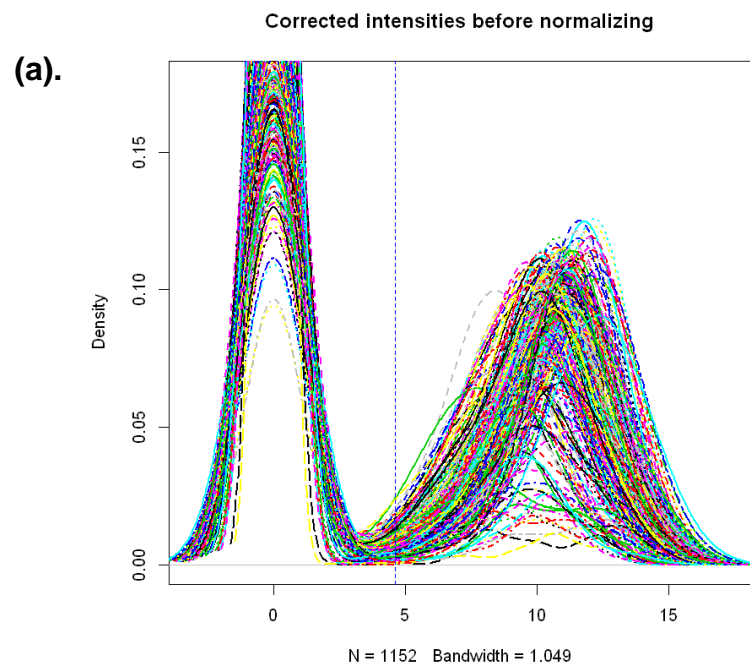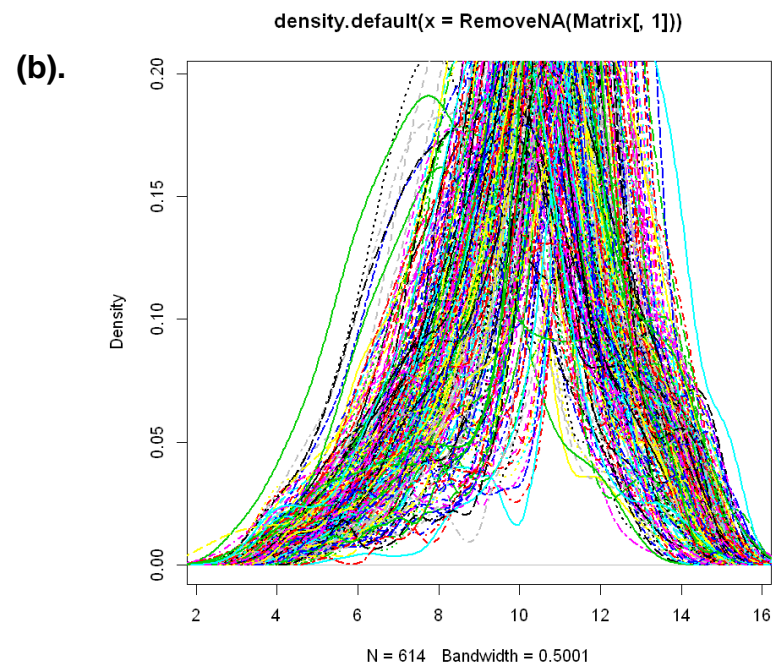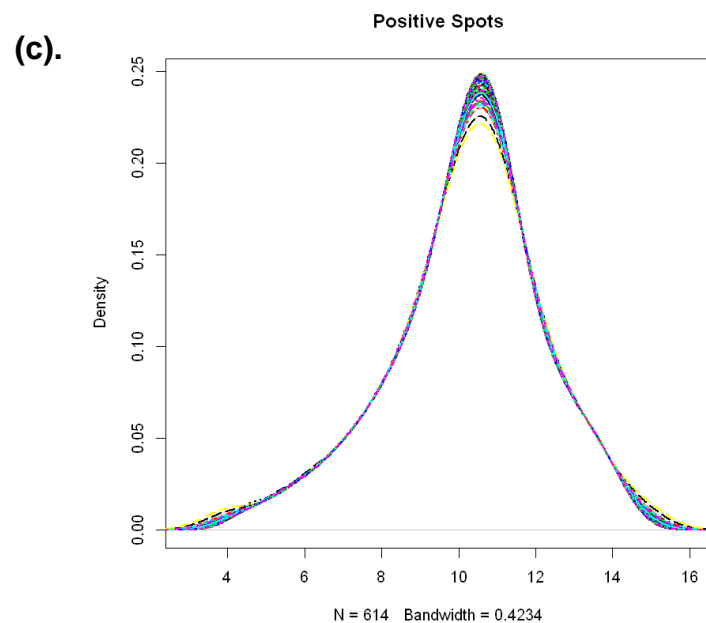

Supplement: s1 [file s1]

**Supplementary Figure S5.**

**(a).**

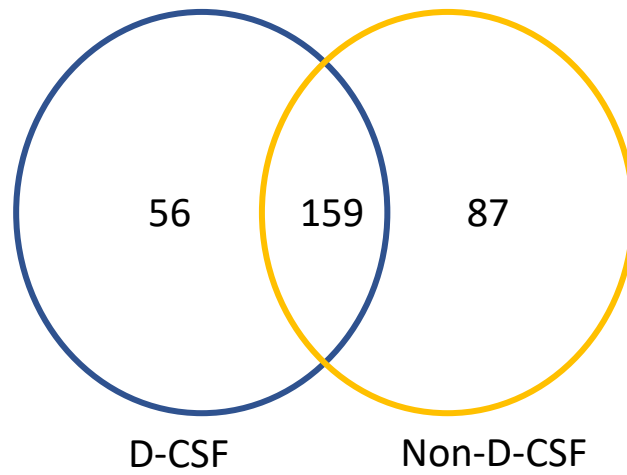

**(b).**

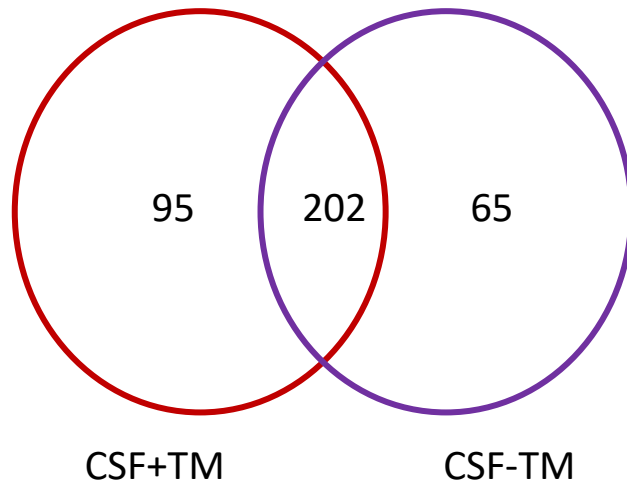

**(c).**

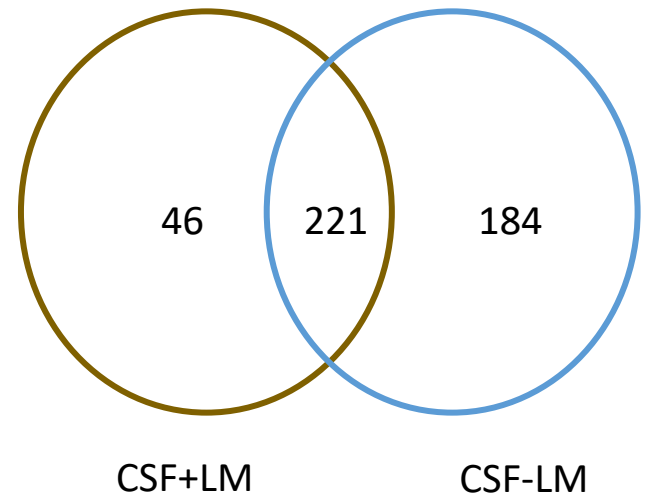

Supplement: s1 [file s1]

Supplementary Figure S11.

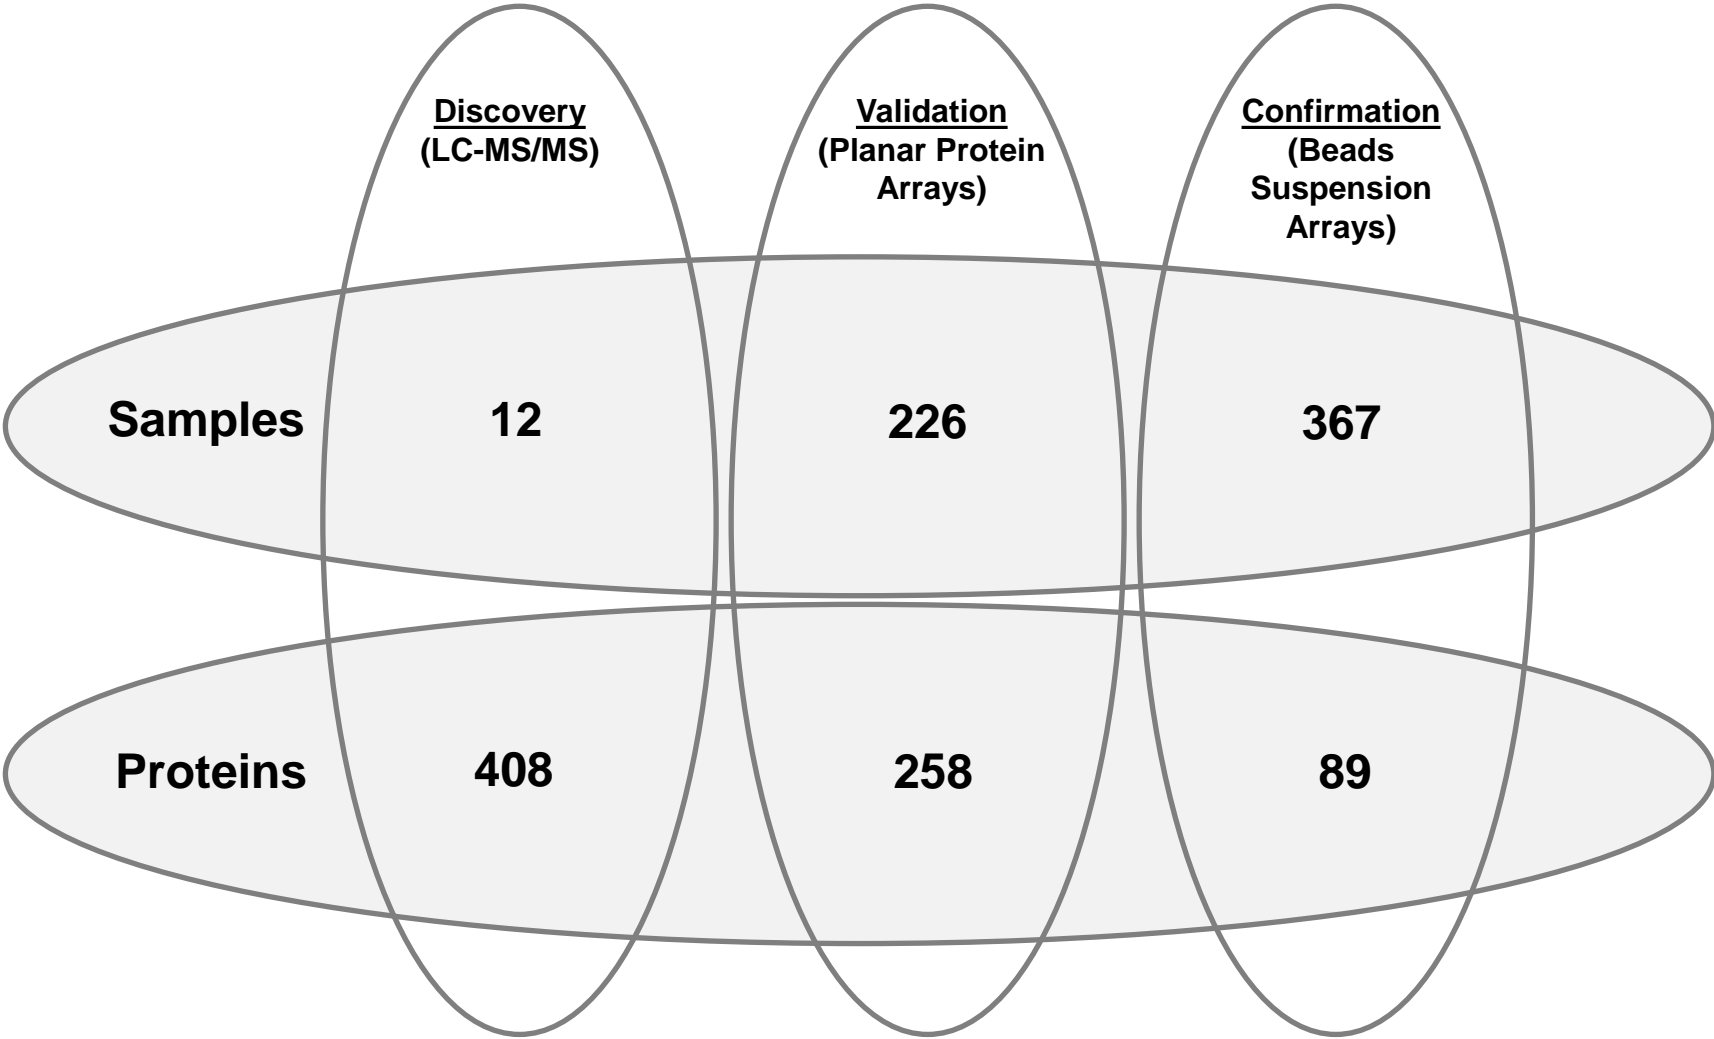

Supplement: s1 [file s1]

Supplementary Figure S1.

(a).

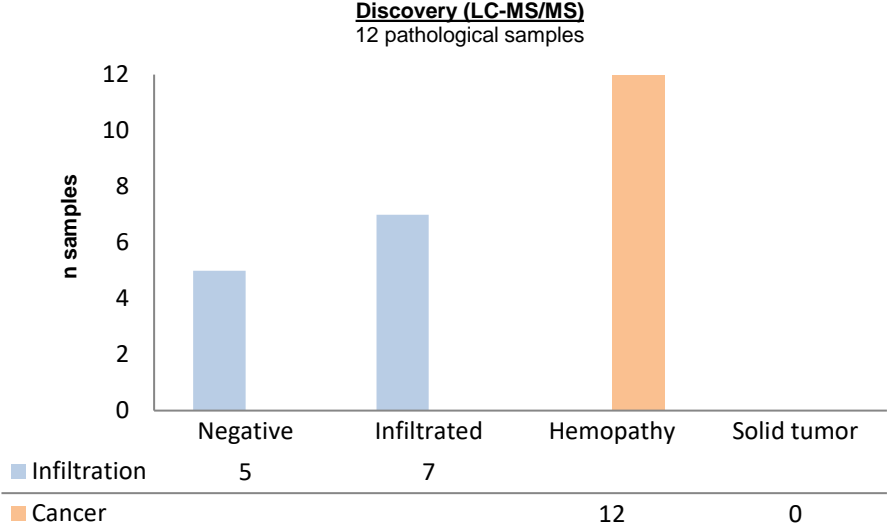

(b).

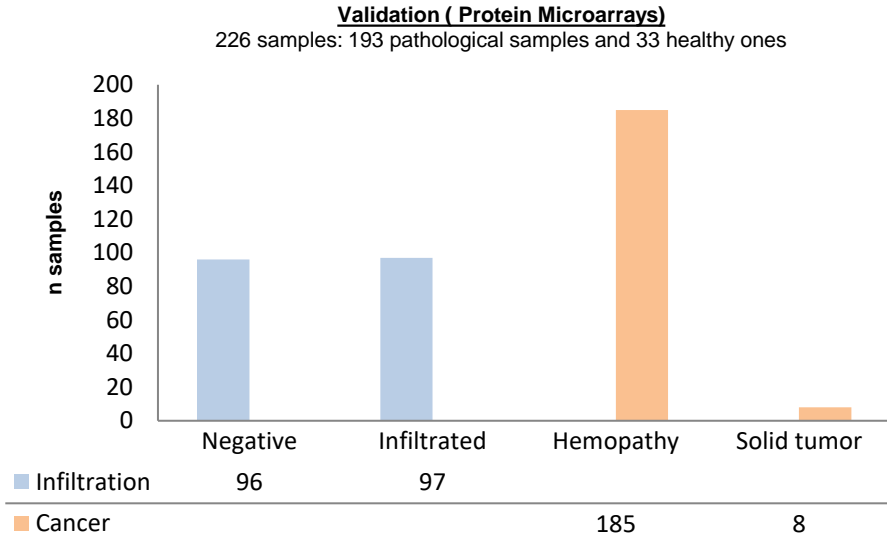

(c).

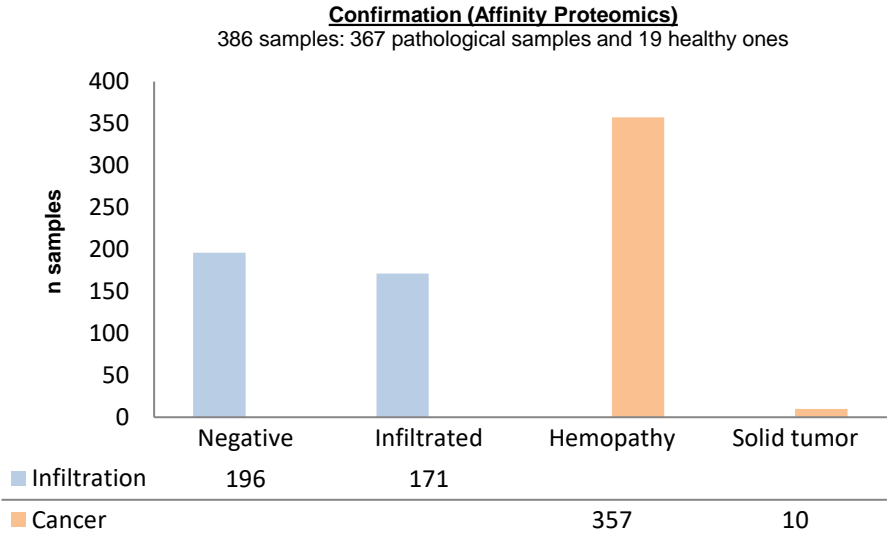

Supplement: s1 [file s1]

Supplementary Figure S10.

(a).

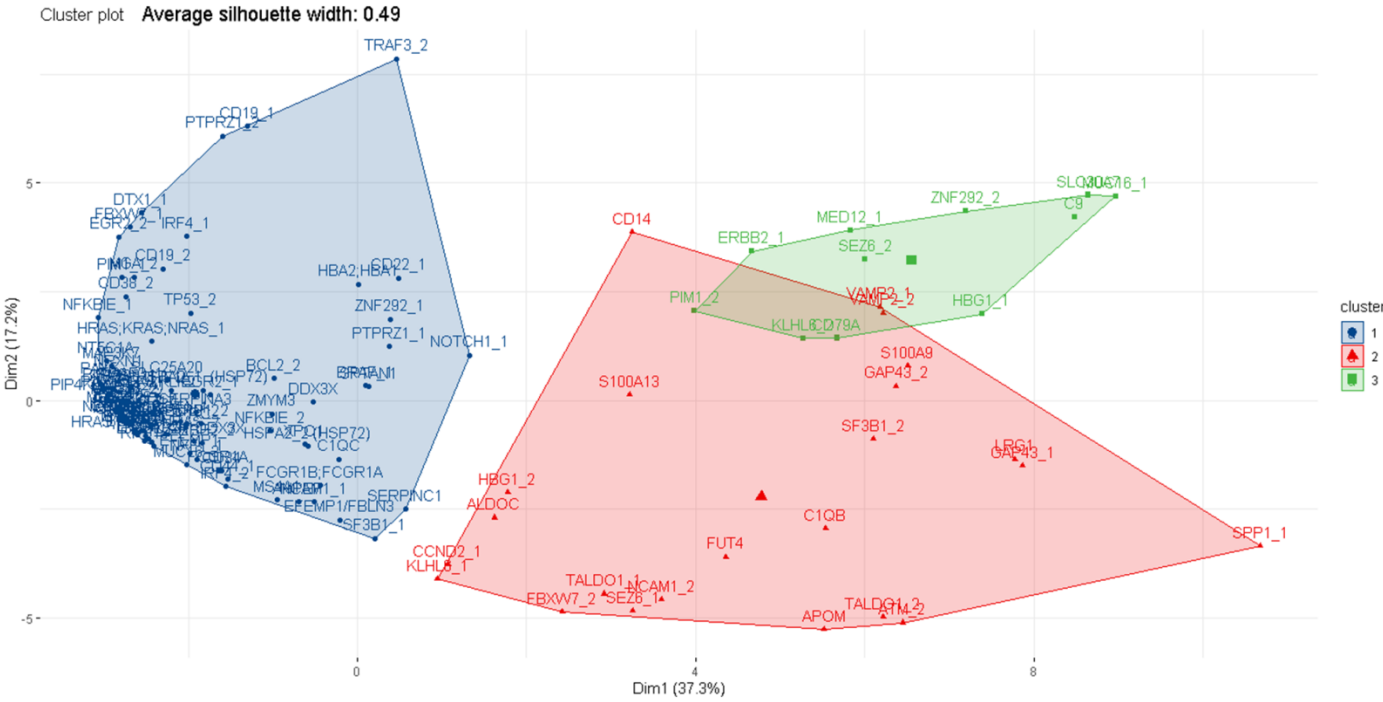

(b).

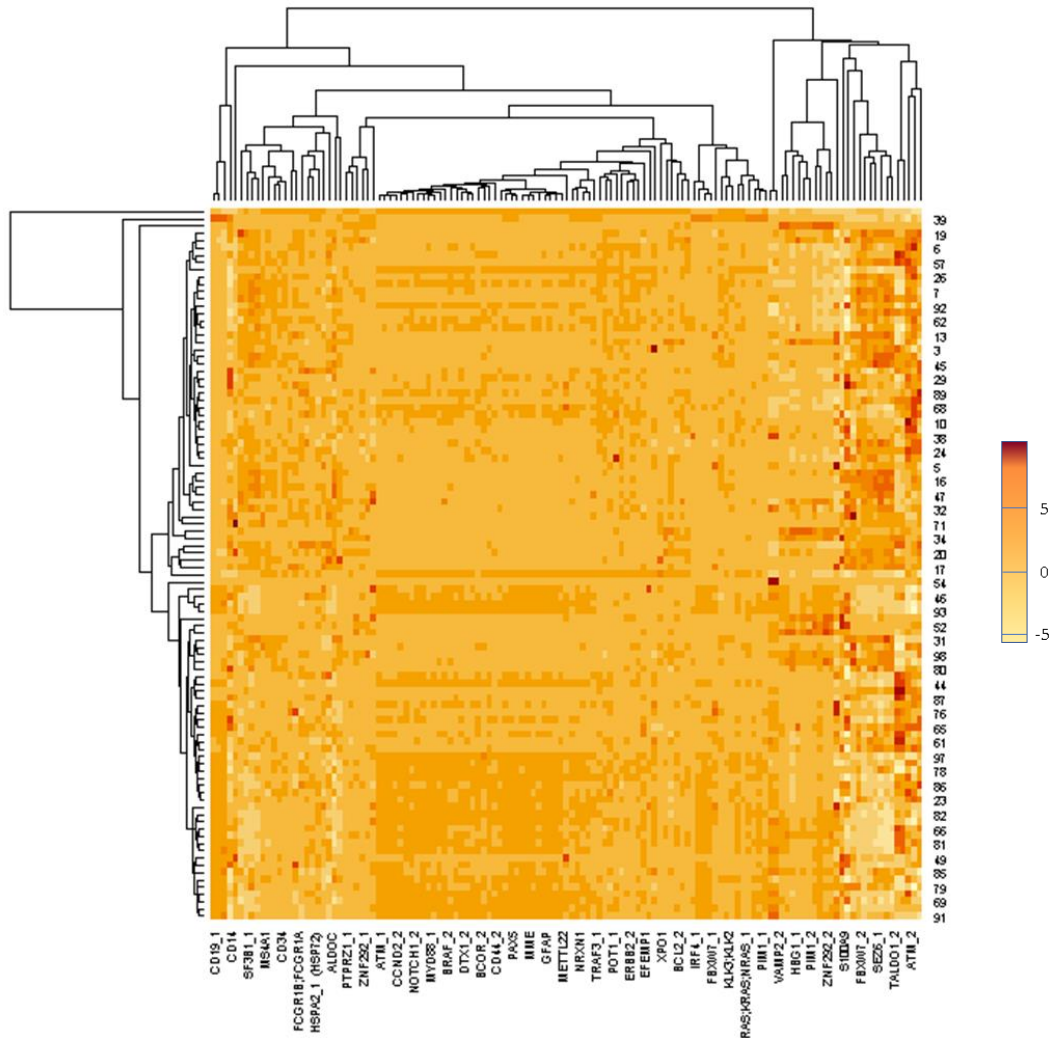

Supplement: s1 [file s1]

Supplementary Figure S7.

(a).

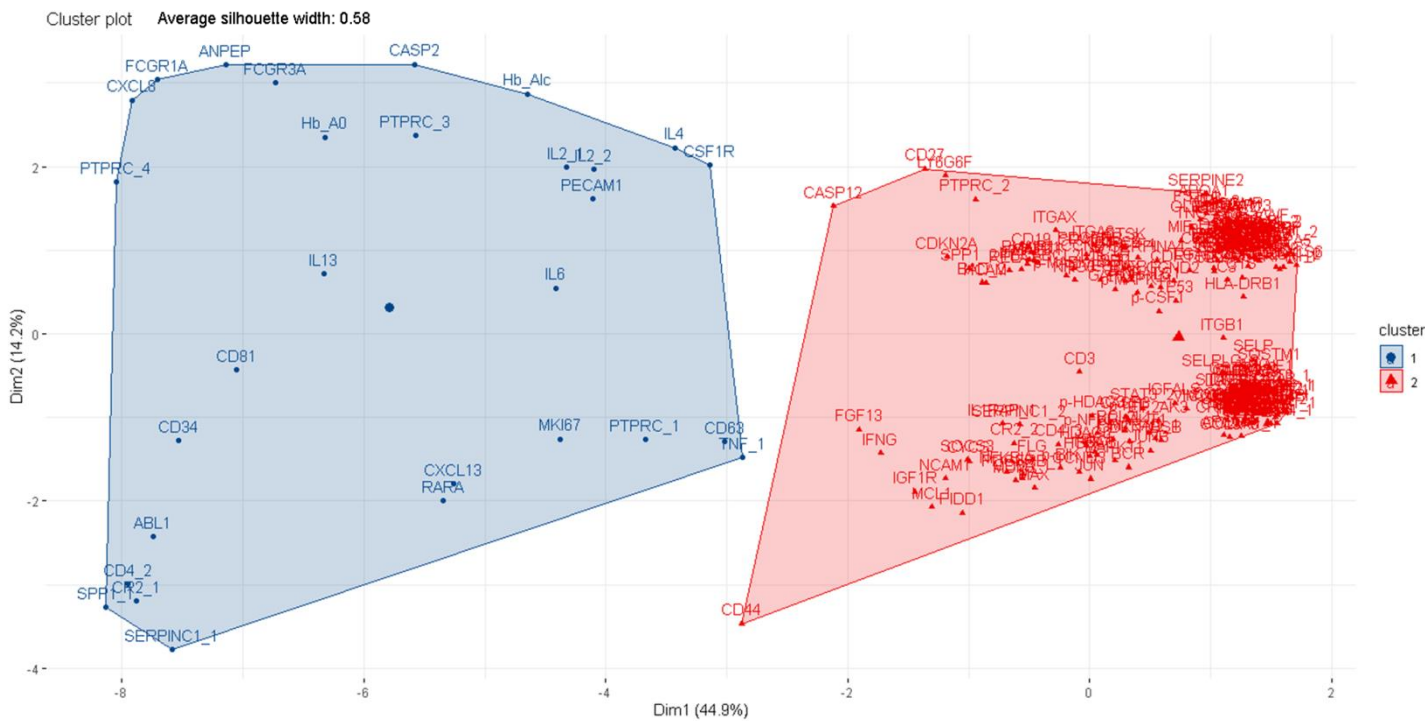

(b).

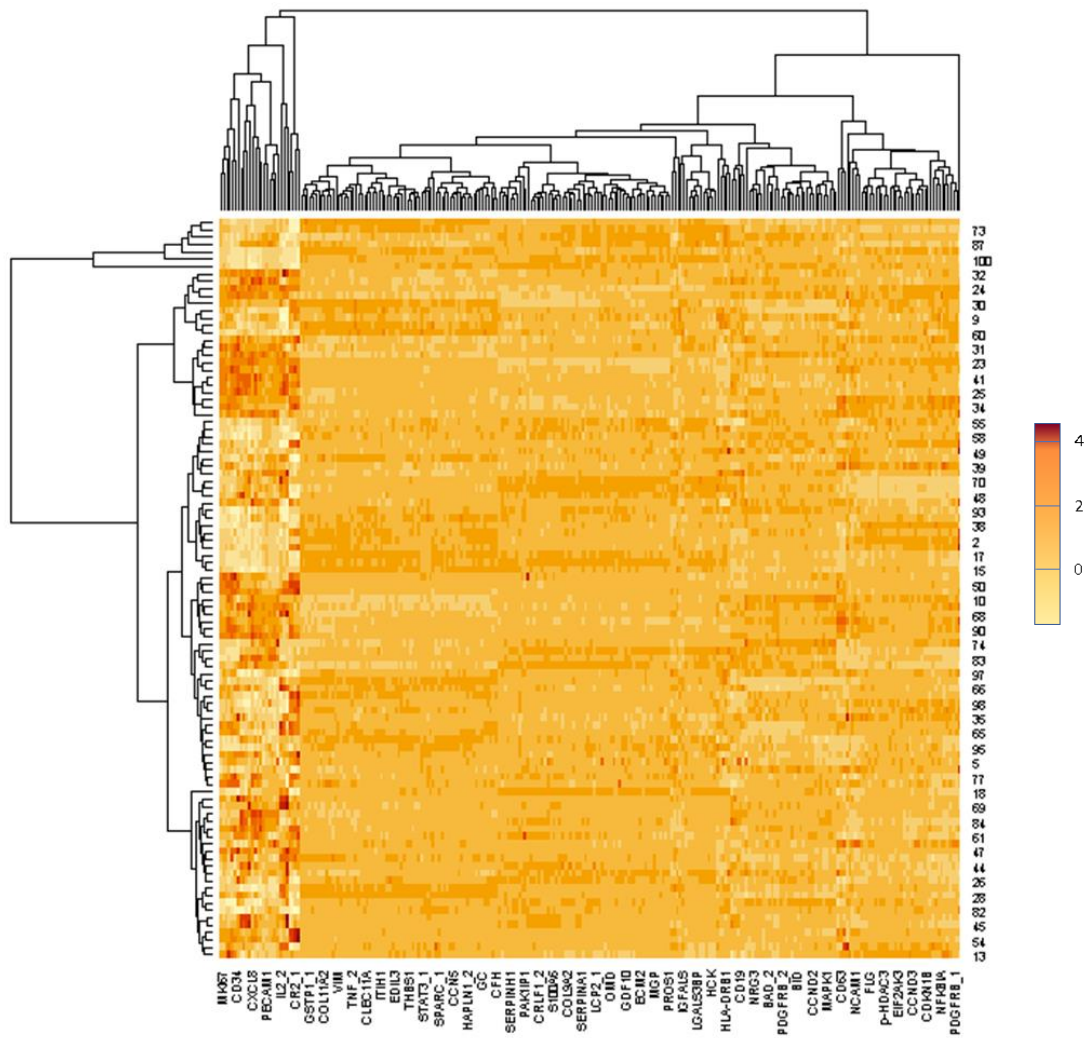

Supplement: s1 [file s1]
